# Supplementary material for: Serotonergic neurons signal reward and punishment on multiple timescales
Source: eLife journal article supplement (doi:10.7554/elife.06346), 2015-02-25
Supplement: supp [file elife-06346-supp-v1.zip]

Archive with 11 entries (11 files):
- elife_poa_e06346_Figure_8_figure_supplement_2.pdf
- elife_poa_e06346_Figure_4_figure_supplement_1.pdf
- elife_poa_e06346_Figure_3_figure_supplement_4.pdf
- elife_poa_e06346_Figure_3_figure_supplement_2.pdf
- elife_poa_e06346_Figure_6_figure_supplement_1.pdf
- elife_poa_e06346_Figure_3_figure_supplement_3.pdf
- elife_poa_e06346_Figure_1_figure_supplement_1.pdf
- elife_poa_e06346_Figure_8_figure_supplement_1.pdf
- elife_poa_e06346_Figure_3_figure_supplement_1.pdf
- elife_poa_e06346_Figure_1_figure_supplement_2.pdf
- elife_poa_e06346_Figure_6_figure_supplement_2.pdf
