# Supplementary figures and images for: Serotonergic neurons signal reward and punishment on multiple timescales
Source: eLife journal article supplement (doi:10.7554/elife.06346), 2015-02-25

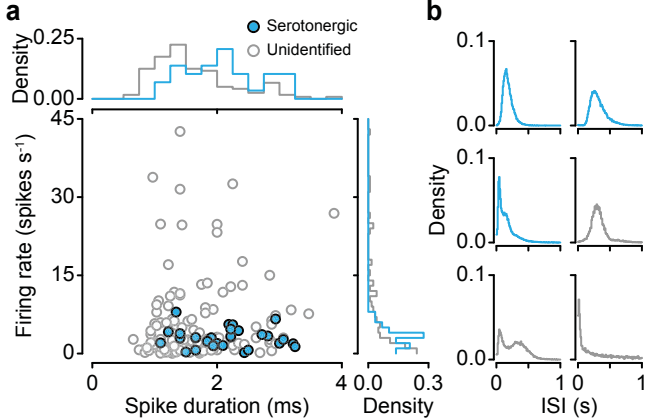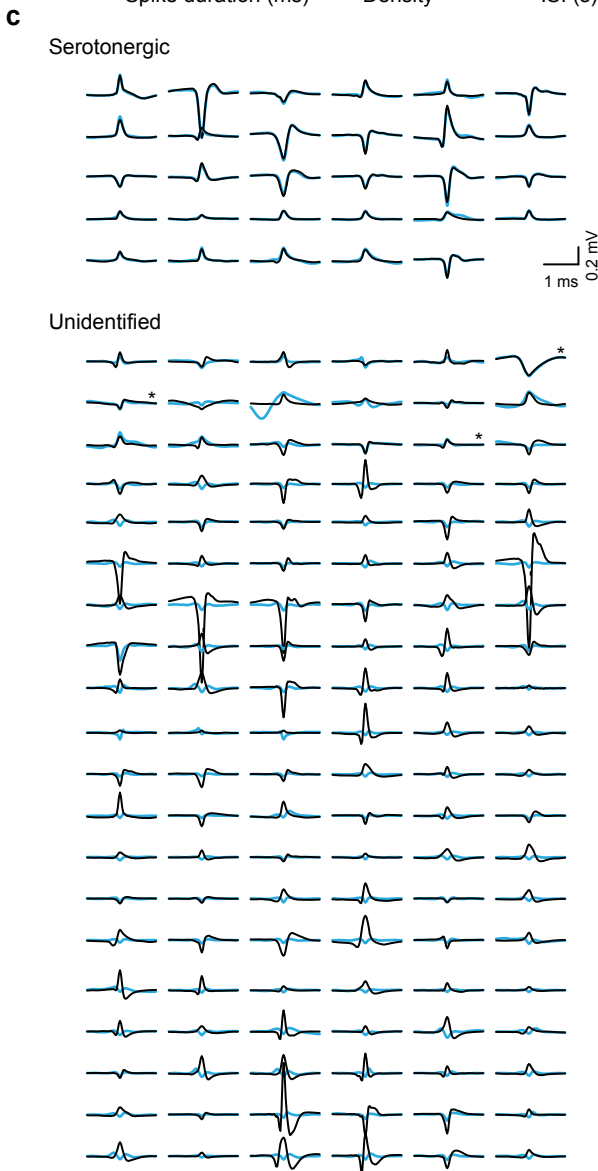

Supplement: supp [file elife-06346-supp-v1.zip › elife_poa_e06346_Figure_8_figure_supplement_2.pdf]

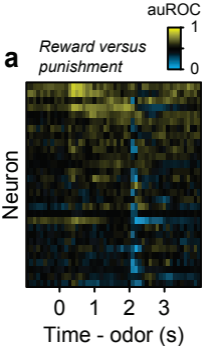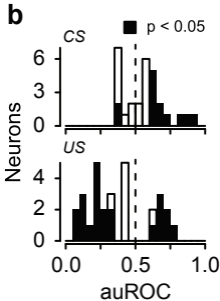

Supplement: supp [file elife-06346-supp-v1.zip › elife_poa_e06346_Figure_4_figure_supplement_1.pdf]

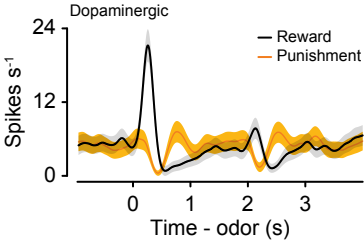

Supplement: supp [file elife-06346-supp-v1.zip › elife_poa_e06346_Figure_3_figure_supplement_4.pdf]

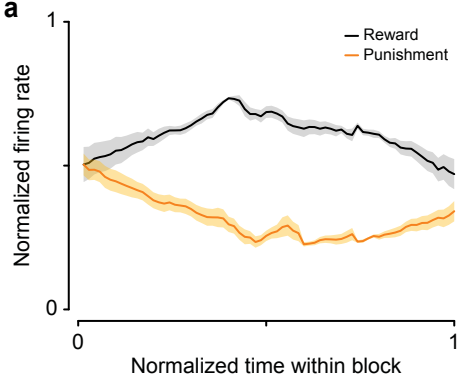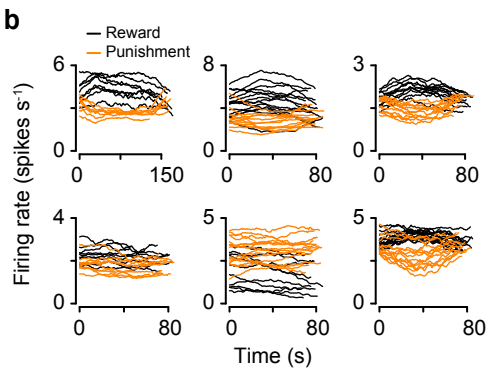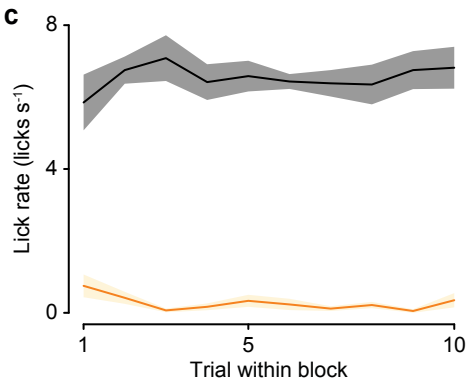

Supplement: supp [file elife-06346-supp-v1.zip › elife_poa_e06346_Figure_3_figure_supplement_2.pdf]

**a**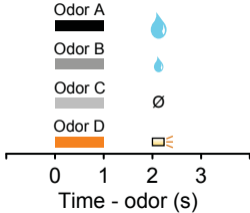**b**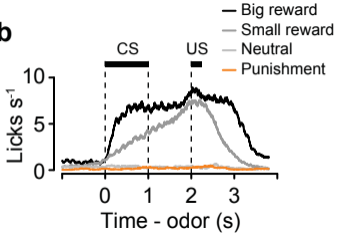

Supplement: supp [file elife-06346-supp-v1.zip › elife_poa_e06346_Figure_6_figure_supplement_1.pdf]

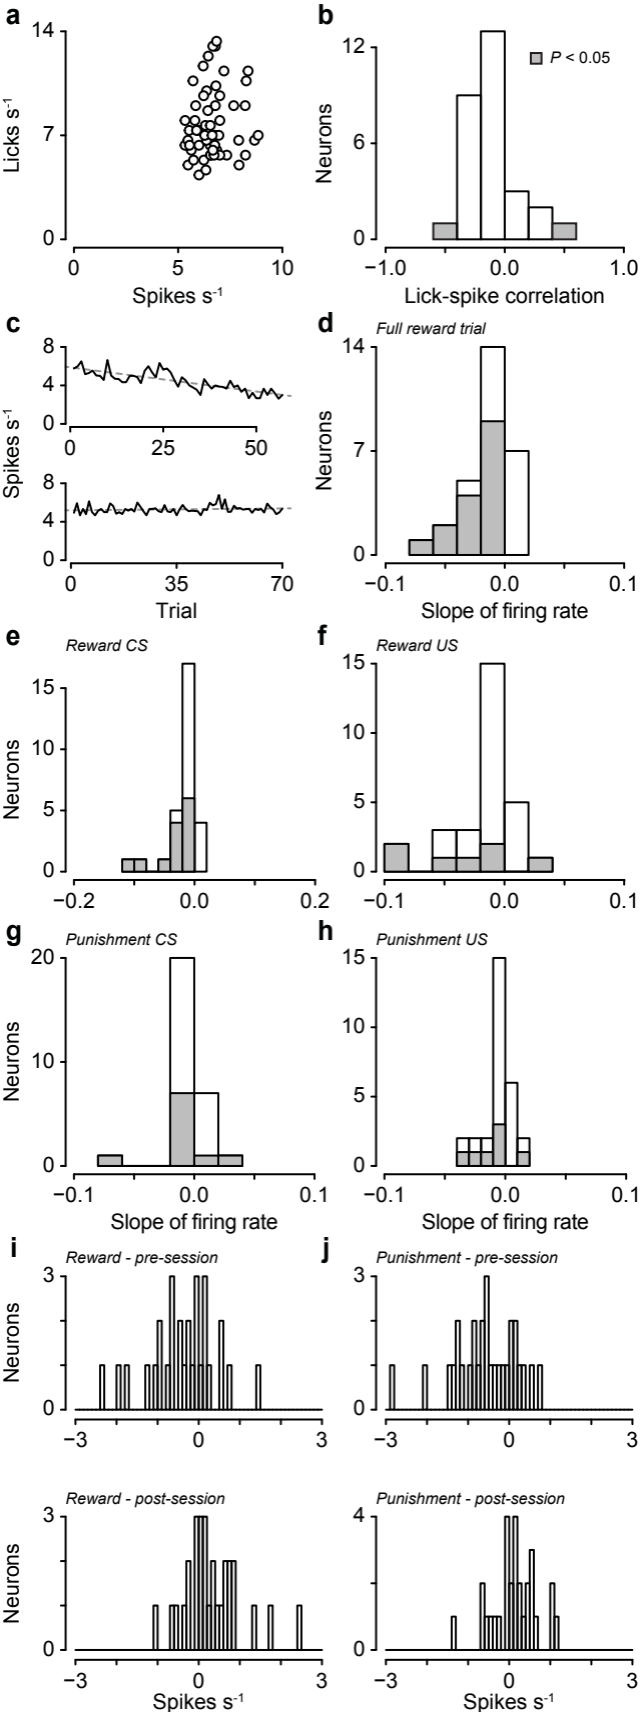

Supplement: supp [file elife-06346-supp-v1.zip › elife_poa_e06346_Figure_3_figure_supplement_3.pdf]

Sessions

8

4

0

-1.5

0.0

1.5

Reward - punishment (licks  $\text{s}^{-1}$ )

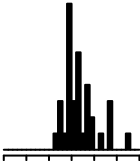

Supplement: supp [file elife-06346-supp-v1.zip › elife_poa_e06346_Figure_1_figure_supplement_1.pdf]

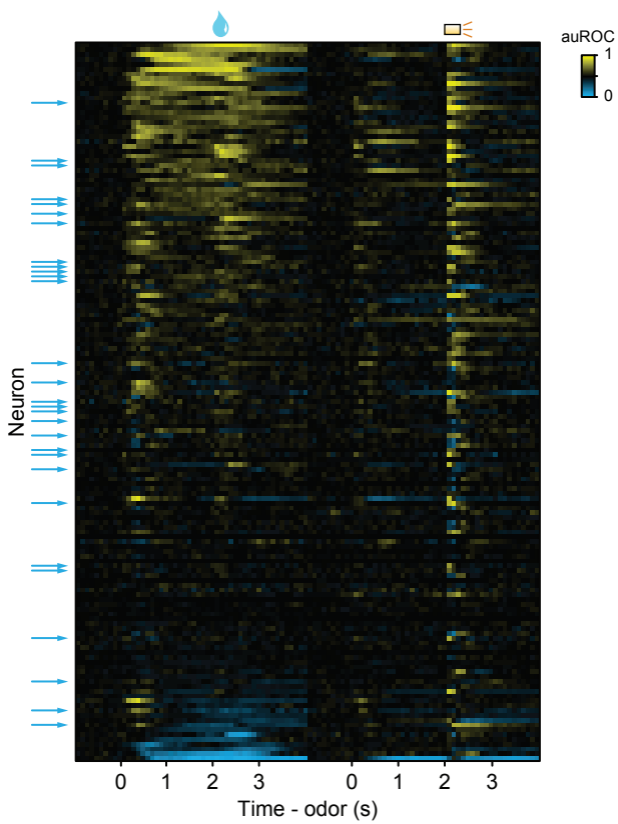

Supplement: supp [file elife-06346-supp-v1.zip › elife_poa_e06346_Figure_8_figure_supplement_1.pdf]

*Reward*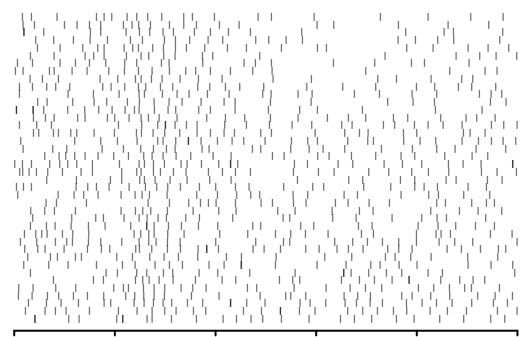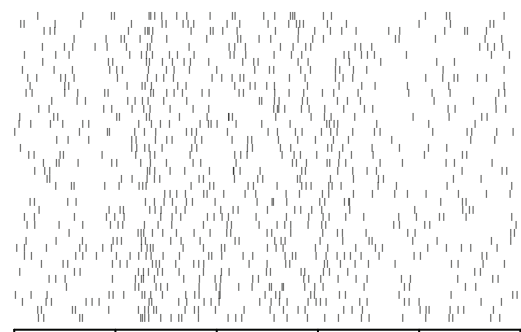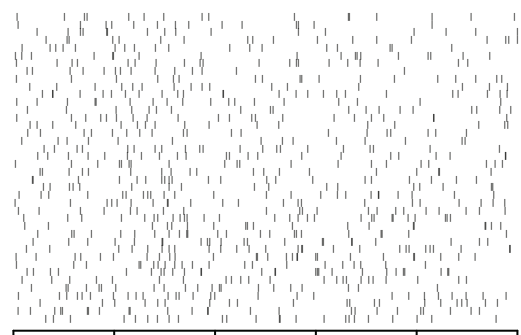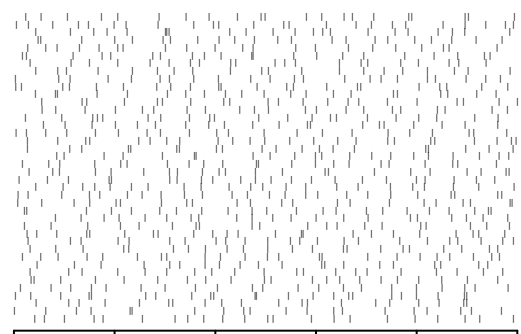

-1 0 1 2 3 4  
Time - odor (s)

*Punishment*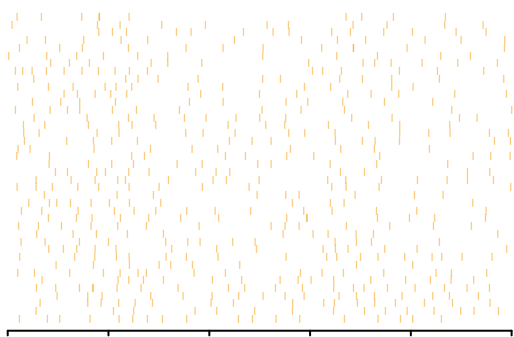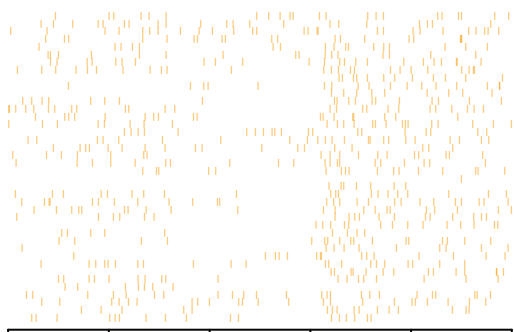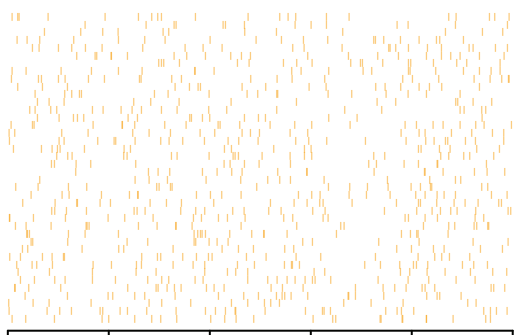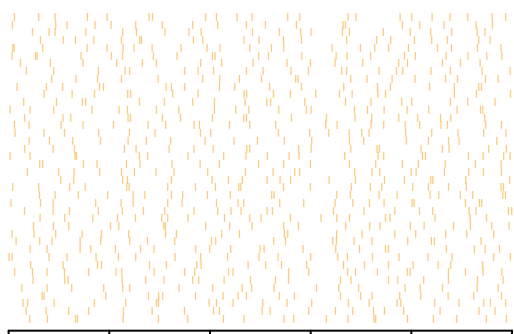

-1 0 1 2 3 4  
Time - odor (s)

Supplement: supp [file elife-06346-supp-v1.zip › elife_poa_e06346_Figure_3_figure_supplement_1.pdf]

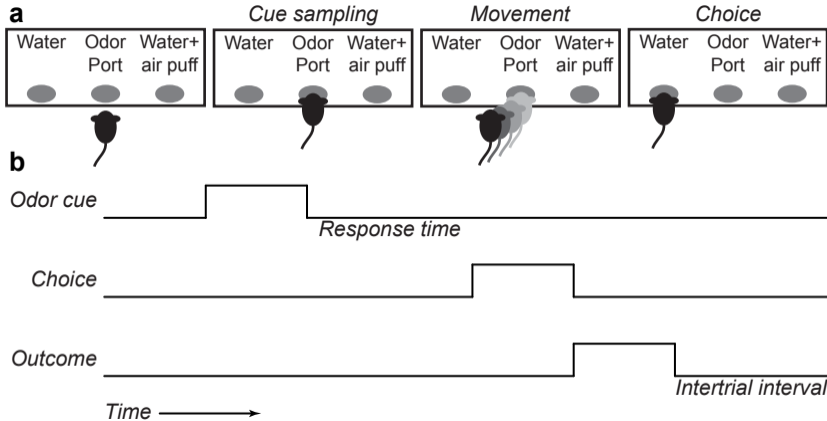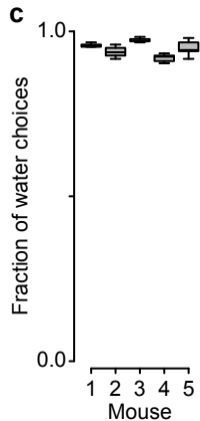

Supplement: supp [file elife-06346-supp-v1.zip › elife_poa_e06346_Figure_1_figure_supplement_2.pdf]

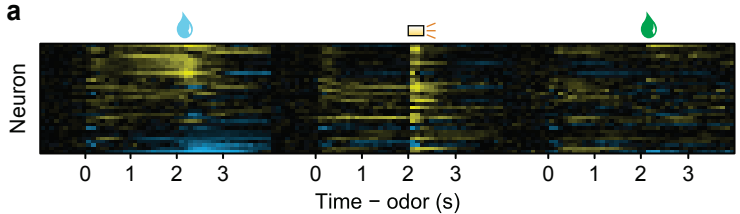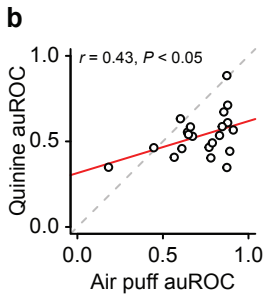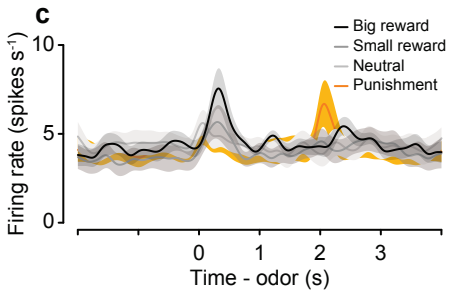

Supplement: supp [file elife-06346-supp-v1.zip › elife_poa_e06346_Figure_6_figure_supplement_2.pdf]
